# Supplementary material for: Isolation and Structure Elucidation of Three New Dolastanes from the Brown Alga Dilophus spiralis
Source: MDPI journal article supplement (doi:10.3390/md11041104), 2013-04-02
Supplement: s1 [file s1]

marinedrugs-11-01104-s001.mol
  corina  04151404383D 1   1.00000     0.00000 
CORINA 3.49 0023  12.04.2013
 23 26  0  0  0  0  0  0  0  0999 V2000
    1.0540    1.8260    0.9370 C   0  0  0  0  0  0  0  0  0  0  0  0
    0.8525    0.2874    0.9317 C   0  0  0  0  0  0  0  0  0  0  0  0
    2.2775   -0.2831    0.7707 C   0  0  0  0  0  0  0  0  0  0  0  0
    2.5722    1.9299    0.5518 C   0  0  0  0  0  0  0  0  0  0  0  0
    2.5751    1.3699   -0.8904 C   0  0  0  0  0  0  0  0  0  0  0  0
    2.7536   -0.1273   -0.7255 C   0  0  0  0  0  0  0  0  0  0  0  0
    1.7019   -0.9195   -1.6011 C   0  0  0  0  0  0  0  0  0  0  0  0
    1.8842   -0.2832   -3.0741 C   0  0  0  0  0  0  0  0  0  0  0  0
    3.3320    0.0350   -3.4402 C   0  0  0  0  0  0  0  0  0  0  0  0
    3.3193    1.6469   -3.3011 C   0  0  0  0  0  0  0  0  0  0  0  0
    3.5784    1.9538   -1.8319 C   0  0  0  0  0  0  0  0  0  0  0  0
    3.5970   -0.1252   -4.9543 C   0  0  0  0  0  0  0  0  0  0  0  0
    4.4879    1.0691   -5.3549 C   0  0  0  0  0  0  0  0  0  0  0  0
    4.6431    1.9308   -4.0834 C   0  0  0  0  0  0  0  0  0  0  0  0
    2.1649    2.4027   -3.9221 C   0  0  0  0  0  0  0  0  0  0  0  0
    1.5700    1.5400   -1.3069 H   0  0  0  0  0  0  0  0  0  0  0  0
    4.1344   -0.4310   -2.9288 H   0  0  0  0  0  0  0  0  0  0  0  0
    4.1464   -0.6911   -0.7137 C   0  0  0  0  0  0  0  0  0  0  0  0
    3.0964    0.8041    1.3384 O   0  0  0  0  0  0  0  0  0  0  0  0
    2.3563   -0.1551   -5.7908 C   0  0  0  0  0  0  0  0  0  0  0  0
    1.5255   -1.4104   -5.8619 C   0  0  0  0  0  0  0  0  0  0  0  0
    1.9925    0.9100   -6.4612 C   0  0  0  0  0  0  0  0  0  0  0  0
    3.2269    3.2870    0.7926 C   0  0  0  0  0  0  0  0  0  0  0  0
  1  2  1  0      
  2  3  1  0      
  3  6  1  0      
  5  4  1  0      
  4  1  1  0      
  5  6  1  0      
  6  7  1  0      
  7  8  1  0      
  8  9  1  0      
  9 10  1  0      
 10 11  1  0      
  5 11  1  0      
  9 12  1  0      
 12 13  1  0      
 13 14  1  0      
 14 10  1  0      
 10 15  1  0      
  5 16  1  0      
  9 17  1  0      
  6 18  1  0      
  4 19  1  0      
  3 19  1  0      
 12 20  1  0      
 20 21  1  0      
 20 22  2  0      
  4 23  1  0      
M  END
$$$$
