# Supplementary material for: Isolation and Structure Elucidation of Three New Dolastanes from the Brown Alga Dilophus spiralis
Source: MDPI journal article supplement (doi:10.3390/md11041104), 2013-04-02
Supplement: s2 [file s2]

marinedrugs-11-01104-s001.mol
  ChemDraw03101420512D

 23 26  0  0  0  0  0  0  0  0999 V2000
   -2.7320    0.2062    0.0000 C   0  0  0  0  0  0  0  0  0  0  0  0
   -2.7320   -0.6188    0.0000 C   0  0  0  0  0  0  0  0  0  0  0  0
   -2.0175   -1.0313    0.0000 C   0  0  0  0  0  0  0  0  0  0  0  0
   -2.0175    0.6188    0.0000 C   0  0  0  0  0  0  0  0  0  0  0  0
   -1.3030    0.2062    0.0000 C   0  0  0  0  0  0  0  0  0  0  0  0
   -1.3030   -0.6188    0.0000 C   0  0  0  0  0  0  0  0  0  0  0  0
   -0.6573   -1.1333    0.0000 C   0  0  0  0  0  0  0  0  0  0  0  0
    0.1473   -0.9511    0.0000 C   0  0  0  0  0  0  0  0  0  0  0  0
    0.5058   -0.2092    0.0000 C   0  0  0  0  0  0  0  0  0  0  0  0
    0.1473    0.5342    0.0000 C   0  0  0  0  0  0  0  0  0  0  0  0
   -0.6573    0.7193    0.0000 C   0  0  0  0  0  0  0  0  0  0  0  0
    1.3236   -0.0979    0.0000 C   0  0  0  0  0  0  0  0  0  0  0  0
    1.4705    0.7143    0.0000 C   0  0  0  0  0  0  0  0  0  0  0  0
    0.7434    1.1049    0.0000 C   0  0  0  0  0  0  0  0  0  0  0  0
   -0.2652    1.2487    0.0000 C   0  0  0  0  0  0  0  0  0  0  0  0
   -1.3030    1.0313    0.0000 H   0  0  0  0  0  0  0  0  0  0  0  0
    0.9183   -0.9236    0.0000 H   0  0  0  0  0  0  0  0  0  0  0  0
   -1.3030   -1.4438    0.0000 C   0  0  0  0  0  0  0  0  0  0  0  0
   -2.3269   -0.2269    0.0000 O   0  0  0  0  0  0  0  0  0  0  0  0
    1.9070   -0.6812    0.0000 C   0  0  0  0  0  0  0  0  0  0  0  0
    2.7320   -0.6812    0.0000 C   0  0  0  0  0  0  0  0  0  0  0  0
    1.4945   -1.3957    0.0000 C   0  0  0  0  0  0  0  0  0  0  0  0
   -2.0175    1.4438    0.0000 C   0  0  0  0  0  0  0  0  0  0  0  0
  1  2  1  0      
  2  3  1  0      
  3  6  1  0      
  5  4  1  0      
  4  1  1  0      
  5  6  1  0      
  6  7  1  0      
  7  8  1  0      
  8  9  1  0      
  9 10  1  0      
 10 11  1  0      
  5 11  1  0      
  9 12  1  0      
 12 13  1  0      
 13 14  1  0      
 14 10  1  0      
 10 15  1  6      
  5 16  1  6      
  9 17  1  1      
  6 18  1  1      
  4 19  1  1      
  3 19  1  1      
 12 20  1  6      
 20 21  1  0      
 20 22  2  0      
  4 23  1  0      
M  END
