# Supplementary material for: Isolation and Structure Elucidation of Three New Dolastanes from the Brown Alga Dilophus spiralis
Source: MDPI journal article supplement (doi:10.3390/md11041104), 2013-04-02
Supplement: s3 [file s3]

marinedrugs-11-01104-s002.mol
  corina  04151404383D 1   1.00000     0.00000 
CORINA 3.49 0023  12.04.2013
 25 27  0  0  0  0  0  0  0  0999 V2000
    1.5884    2.1468    0.9046 C   0  0  0  0  0  0  0  0  0  0  0  0
    1.3922    0.6591    1.1810 C   0  0  0  0  0  0  0  0  0  0  0  0
    1.4849   -0.0774   -0.1498 C   0  0  0  0  0  0  0  0  0  0  0  0
    2.9794    2.3571    0.3048 C   0  0  0  0  0  0  0  0  0  0  0  0
    3.2290    1.5445   -0.9615 C   0  0  0  0  0  0  0  0  0  0  0  0
    2.8895    0.0313   -0.7897 C   0  0  0  0  0  0  0  0  0  0  0  0
    2.5512   -0.3228   -2.2619 C   0  0  0  0  0  0  0  0  0  0  0  0
    3.6954   -1.0041   -3.0540 C   0  0  0  0  0  0  0  0  0  0  0  0
    5.0538   -0.3989   -2.7604 C   0  0  0  0  0  0  0  0  0  0  0  0
    5.1429    1.0979   -2.6387 C   0  0  0  0  0  0  0  0  0  0  0  0
    4.6935    1.6975   -1.3150 C   0  0  0  0  0  0  0  0  0  0  0  0
    6.1433   -0.7843   -3.7845 C   0  0  0  0  0  0  0  0  0  0  0  0
    7.2989    0.1148   -3.2710 C   0  0  0  0  0  0  0  0  0  0  0  0
    6.5867    1.4187   -2.9627 C   0  0  0  0  0  0  0  0  0  0  0  0
    4.3187    1.7803   -3.7275 C   0  0  0  0  0  0  0  0  0  0  0  0
    2.5816    1.9551   -1.7645 H   0  0  0  0  0  0  0  0  0  0  0  0
    5.4389   -0.8393   -1.8189 H   0  0  0  0  0  0  0  0  0  0  0  0
    3.8788   -0.8423   -0.0622 C   0  0  0  0  0  0  0  0  0  0  0  0
    5.8107   -0.5202   -5.2157 C   0  0  0  0  0  0  0  0  0  0  0  0
    4.8607   -1.4316   -5.9491 C   0  0  0  0  0  0  0  0  0  0  0  0
    6.3447    0.5038   -5.8340 C   0  0  0  0  0  0  0  0  0  0  0  0
    7.0798    2.5185   -2.9730 O   0  0  0  0  0  0  0  0  0  0  0  0
    3.0684    3.7511   -0.0563 O   0  0  0  0  0  0  0  0  0  0  0  0
    4.0294    2.1011    1.3801 C   0  0  0  0  0  0  0  0  0  0  0  0
    1.1961   -1.4598    0.0587 O   0  0  0  0  0  0  0  0  0  0  0  0
  1  2  1  0      
  2  3  1  0      
  3  6  1  0      
  5  4  1  0      
  4  1  1  0      
  5  6  1  0      
  6  7  1  0      
  7  8  1  0      
  8  9  1  0      
  9 10  1  0      
 10 11  1  0      
  5 11  1  0      
  9 12  1  0      
 12 13  1  0      
 13 14  1  0      
 14 10  1  0      
 10 15  1  0      
  5 16  1  0      
  9 17  1  0      
  6 18  1  0      
 12 19  1  0      
 19 20  1  0      
 19 21  2  0      
 14 22  2  0      
  4 23  1  0      
  4 24  1  0      
  3 25  1  0      
M  END
$$$$
