# Supplementary material for: Isolation and Structure Elucidation of Three New Dolastanes from the Brown Alga Dilophus spiralis
Source: MDPI journal article supplement (doi:10.3390/md11041104), 2013-04-02
Supplement: s4 [file s4]

marinedrugs-11-01104-s002.mol
  ChemDraw03101420512D

 25 27  0  0  0  0  0  0  0  0999 V2000
   -2.7320    0.1835    0.0000 C   0  0  0  0  0  0  0  0  0  0  0  0
   -2.7320   -0.6415    0.0000 C   0  0  0  0  0  0  0  0  0  0  0  0
   -2.0175   -1.0540    0.0000 C   0  0  0  0  0  0  0  0  0  0  0  0
   -2.0175    0.5960    0.0000 C   0  0  0  0  0  0  0  0  0  0  0  0
   -1.3030    0.1835    0.0000 C   0  0  0  0  0  0  0  0  0  0  0  0
   -1.3030   -0.6415    0.0000 C   0  0  0  0  0  0  0  0  0  0  0  0
   -0.6573   -1.1561    0.0000 C   0  0  0  0  0  0  0  0  0  0  0  0
    0.1473   -0.9739    0.0000 C   0  0  0  0  0  0  0  0  0  0  0  0
    0.5058   -0.2320    0.0000 C   0  0  0  0  0  0  0  0  0  0  0  0
    0.1473    0.5114    0.0000 C   0  0  0  0  0  0  0  0  0  0  0  0
   -0.6573    0.6965    0.0000 C   0  0  0  0  0  0  0  0  0  0  0  0
    1.3236   -0.1207    0.0000 C   0  0  0  0  0  0  0  0  0  0  0  0
    1.4705    0.6915    0.0000 C   0  0  0  0  0  0  0  0  0  0  0  0
    0.7434    1.0822    0.0000 C   0  0  0  0  0  0  0  0  0  0  0  0
   -0.2652    1.2259    0.0000 C   0  0  0  0  0  0  0  0  0  0  0  0
   -1.3030    1.0085    0.0000 H   0  0  0  0  0  0  0  0  0  0  0  0
    0.9183   -0.9464    0.0000 H   0  0  0  0  0  0  0  0  0  0  0  0
   -1.3030   -1.4665    0.0000 C   0  0  0  0  0  0  0  0  0  0  0  0
    1.9070   -0.7040    0.0000 C   0  0  0  0  0  0  0  0  0  0  0  0
    2.7320   -0.7040    0.0000 C   0  0  0  0  0  0  0  0  0  0  0  0
    1.4945   -1.4185    0.0000 C   0  0  0  0  0  0  0  0  0  0  0  0
    0.5299    1.8790    0.0000 O   0  0  0  0  0  0  0  0  0  0  0  0
   -2.6009    1.1793    0.0000 O   0  0  0  0  0  0  0  0  0  0  0  0
   -1.6050    1.3104    0.0000 C   0  0  0  0  0  0  0  0  0  0  0  0
   -2.0175   -1.8790    0.0000 O   0  0  0  0  0  0  0  0  0  0  0  0
  1  2  1  0      
  2  3  1  0      
  3  6  1  0      
  5  4  1  0      
  4  1  1  0      
  5  6  1  0      
  6  7  1  0      
  7  8  1  0      
  8  9  1  0      
  9 10  1  0      
 10 11  1  0      
  5 11  1  0      
  9 12  1  0      
 12 13  1  0      
 13 14  1  0      
 14 10  1  0      
 10 15  1  6      
  5 16  1  6      
  9 17  1  1      
  6 18  1  1      
 12 19  1  6      
 19 20  1  0      
 19 21  2  0      
 14 22  2  0      
  4 23  1  6      
  4 24  1  1      
  3 25  1  1      
M  END
