# Supplementary material for: Isolation and Structure Elucidation of Three New Dolastanes from the Brown Alga Dilophus spiralis
Source: MDPI journal article supplement (doi:10.3390/md11041104), 2013-04-02
Supplement: s5 [file s5]

marinedrugs-11-01104-s003.mol
  corina  04151404383D 1   1.00000     0.00000 
CORINA 3.49 0023  12.04.2013
 24 26  0  0  0  0  0  0  0  0999 V2000
    0.1565    2.2048   -0.9155 C   0  0  0  0  0  0  0  0  0  0  0  0
    0.0846    0.7119   -0.9907 C   0  0  0  0  0  0  0  0  0  0  0  0
    1.4646    0.0757   -1.1359 C   0  0  0  0  0  0  0  0  0  0  0  0
    1.2611    2.8767   -0.7647 C   0  0  0  0  0  0  0  0  0  0  0  0
    2.5912    2.1503   -0.6738 C   0  0  0  0  0  0  0  0  0  0  0  0
    2.4657    0.7831   -0.1742 C   0  0  0  0  0  0  0  0  0  0  0  0
    3.6300   -0.1317   -0.0618 C   0  0  0  0  0  0  0  0  0  0  0  0
    4.4969    0.0533    1.1830 C   0  0  0  0  0  0  0  0  0  0  0  0
    5.4648    1.2442    0.9141 C   0  0  0  0  0  0  0  0  0  0  0  0
    4.9556    2.4951    0.2565 C   0  0  0  0  0  0  0  0  0  0  0  0
    3.5562    2.9823    0.1757 C   0  0  0  0  0  0  0  0  0  0  0  0
    6.8611    0.9878    0.4076 C   0  0  0  0  0  0  0  0  0  0  0  0
    7.3326    2.3553   -0.1188 C   0  0  0  0  0  0  0  0  0  0  0  0
    6.1949    3.3234    0.1890 C   0  0  0  0  0  0  0  0  0  0  0  0
    5.1466    2.1439   -1.1928 C   0  0  0  0  0  0  0  0  0  0  0  0
    2.9012    2.1197   -1.7263 H   0  0  0  0  0  0  0  0  0  0  0  0
    5.6540    1.5968    1.9923 H   0  0  0  0  0  0  0  0  0  0  0  0
    1.7543    0.8182    1.1980 C   0  0  0  0  0  0  0  0  0  0  0  0
    7.0345   -0.1193   -0.5758 C   0  0  0  0  0  0  0  0  0  0  0  0
    7.0198   -1.5518   -0.1081 C   0  0  0  0  0  0  0  0  0  0  0  0
    7.1995    0.1532   -1.8465 C   0  0  0  0  0  0  0  0  0  0  0  0
    6.2704    4.5129    0.3474 O   0  0  0  0  0  0  0  0  0  0  0  0
    1.3757   -1.3102   -0.8096 O   0  0  0  0  0  0  0  0  0  0  0  0
    1.1988    4.3765   -0.6965 C   0  0  0  0  0  0  0  0  0  0  0  0
  1  2  1  0      
  2  3  1  0      
  3  6  1  0      
  5  4  1  0      
  4  1  2  0      
  5  6  1  0      
  6  7  1  0      
  7  8  1  0      
  8  9  1  0      
  9 10  1  0      
 10 11  1  0      
  5 11  1  0      
  9 12  1  0      
 12 13  1  0      
 13 14  1  0      
 14 10  1  0      
 10 15  1  0      
  5 16  1  0      
  9 17  1  0      
  6 18  1  0      
 12 19  1  0      
 19 20  1  0      
 19 21  2  0      
 14 22  2  0      
  3 23  1  0      
  4 24  1  0      
M  END
$$$$
